# Supplementary material
Source: Frontiers journal article supplement (https://www.frontiersin.org/articles/484354)
Supplement: Image_1.pdf [file Image_1.pdf]

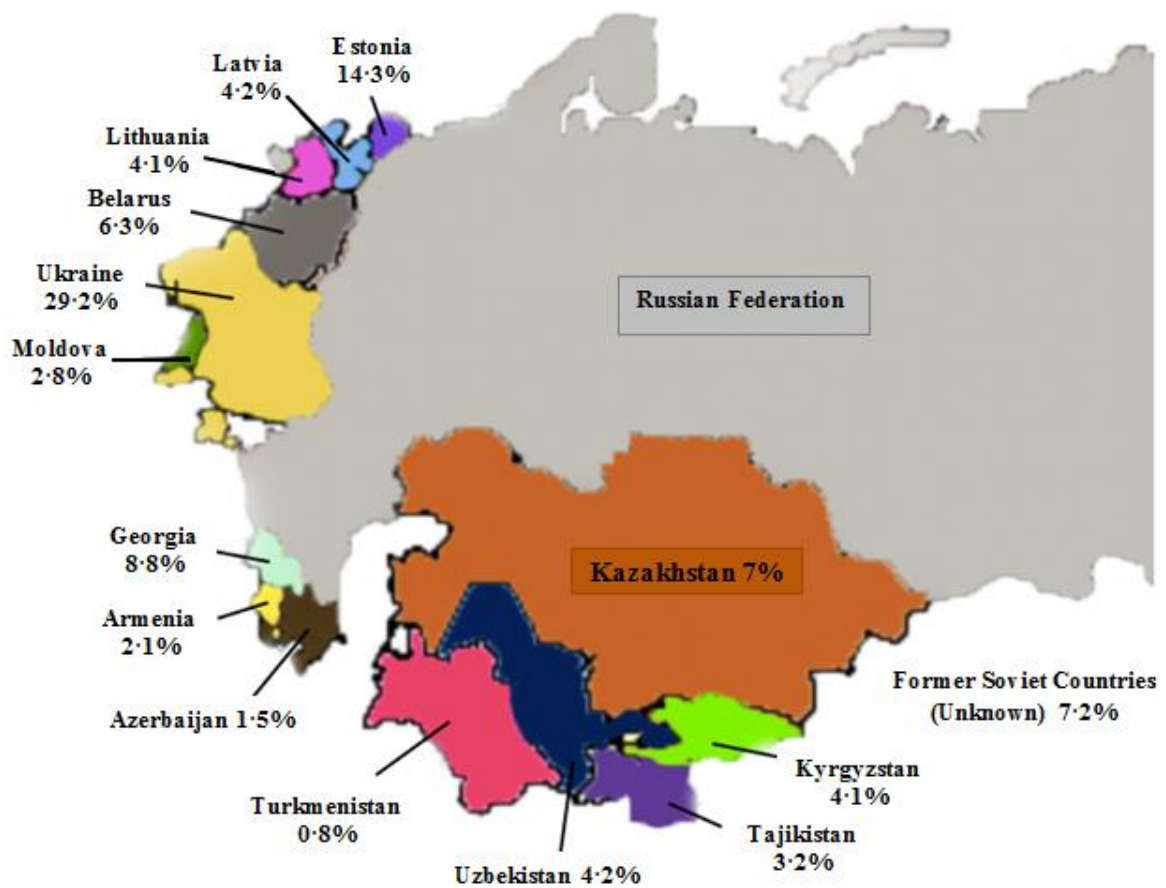

*Supplemental Figure 1.* Map of the Countries of the Former Soviet Union with percentages of the total articles published by country.
